# Supplementary material
Source: publisher figshare collection journal article supplement (https://tandf.figshare.com/articles/dataset/_/9408578)
Supplement: Supplementary file 1 [file 1]

Archive with 2 entries (2 files):
- tnzg_a_1651747_sm6488.mov
- tnzg_a_1651747_sm6487.pdf
