# Supplementary material
Source: publisher figshare collection journal article supplement (https://tandf.figshare.com/articles/dataset/_/9408578)
Supplement: Supplementary file 1 [file 1 › tnzg_a_1651747_sm6487.pdf]

**[Updated seafloor topography and T phase seismicity at Monowai, northern Kermadec Arc]**

[D. Metz<sup>1</sup>, A. B. Watts<sup>2</sup>, I. Grevemeyer<sup>3</sup>, R. Werner<sup>3</sup>, H. Huusmann<sup>3</sup>]

<sup>1</sup>Research Institute for Marine Geodynamics, Japan Agency for Marine-Earth Science and Technology

<sup>2</sup>Department of Earth Sciences, University of Oxford, United Kingdom

<sup>3</sup>GEOMAR Helmholtz Centre for Ocean Research Kiel, Kiel, Germany

**Contents of this file**

Figure S1 with caption

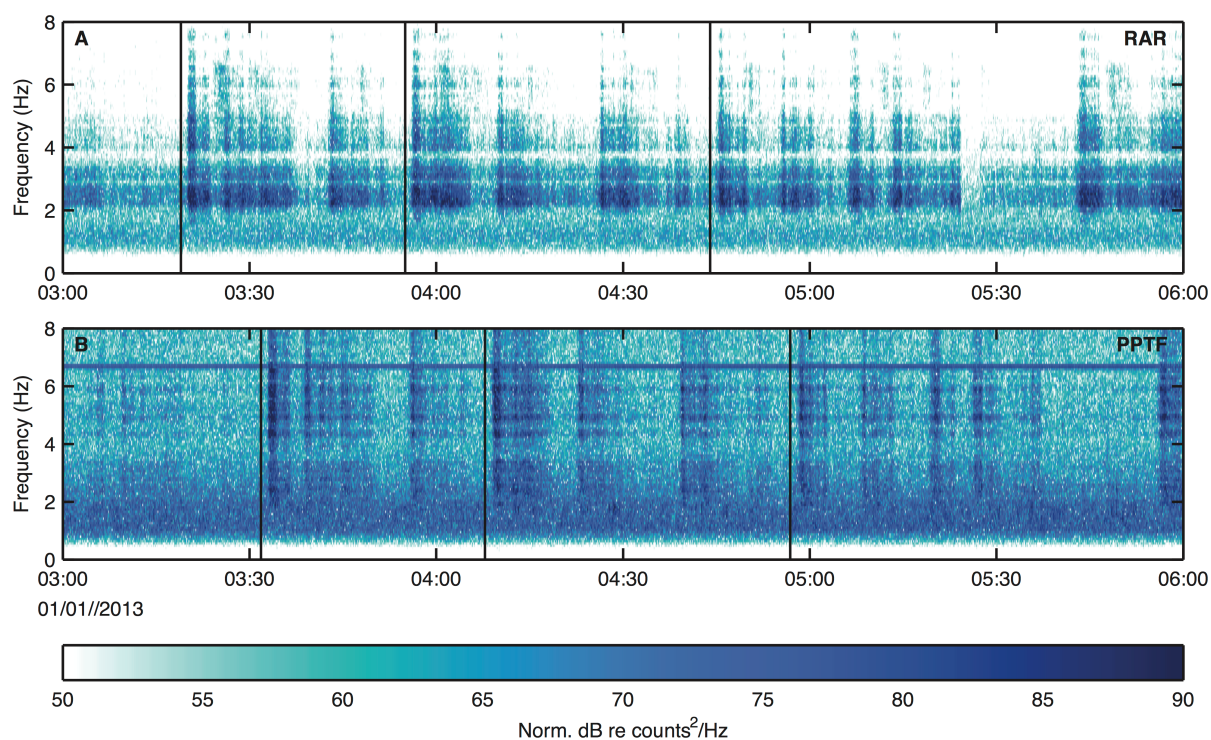

**Figure S1:** Normalized, 3h-long spectrogram plots of T phases associated with eruptive activity at Monowai, recorded on the vertical component of Rarotonga (RAR) and Papeete (PPTF) broadband stations. Both time window and processing parameters correspond to data shown in Figure 3A-B in the main article, with the exception of the band-pass filter. Here, a high-pass filter of 1 Hz is applied to illustrate the full range of the T phase arrivals. For clarity, vertical black lines highlight corresponding arrivals. Note the distinctly lower background noise levels at the RAR seismometer.
